# Supplementary material
Source: publisher figshare collection journal article supplement (https://karger.figshare.com/articles/dataset/_/16715383)

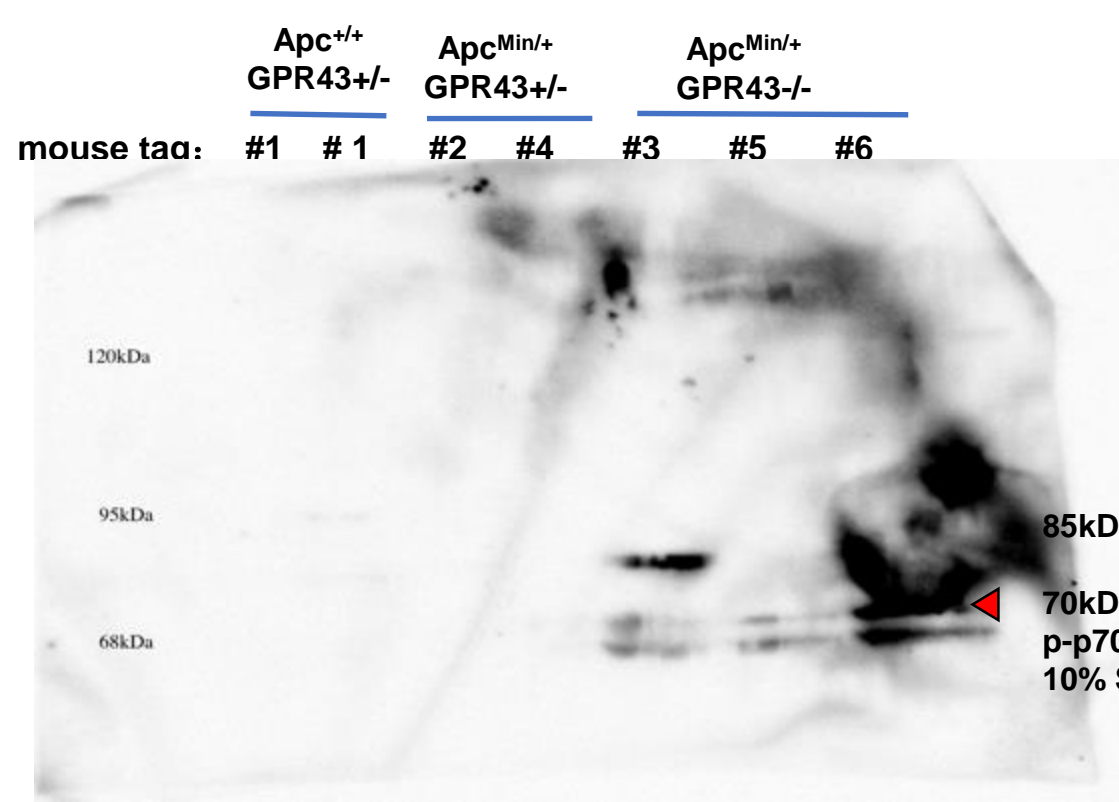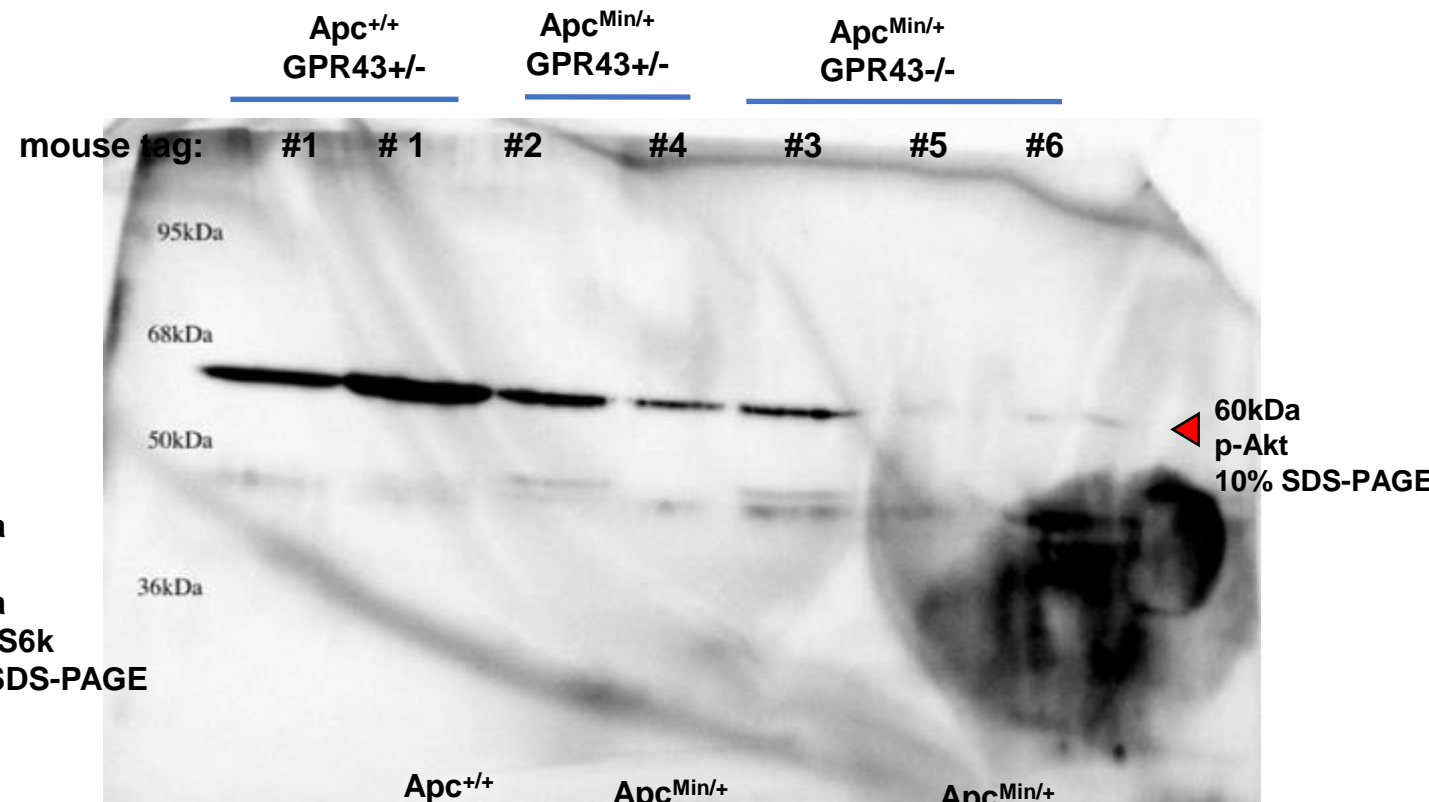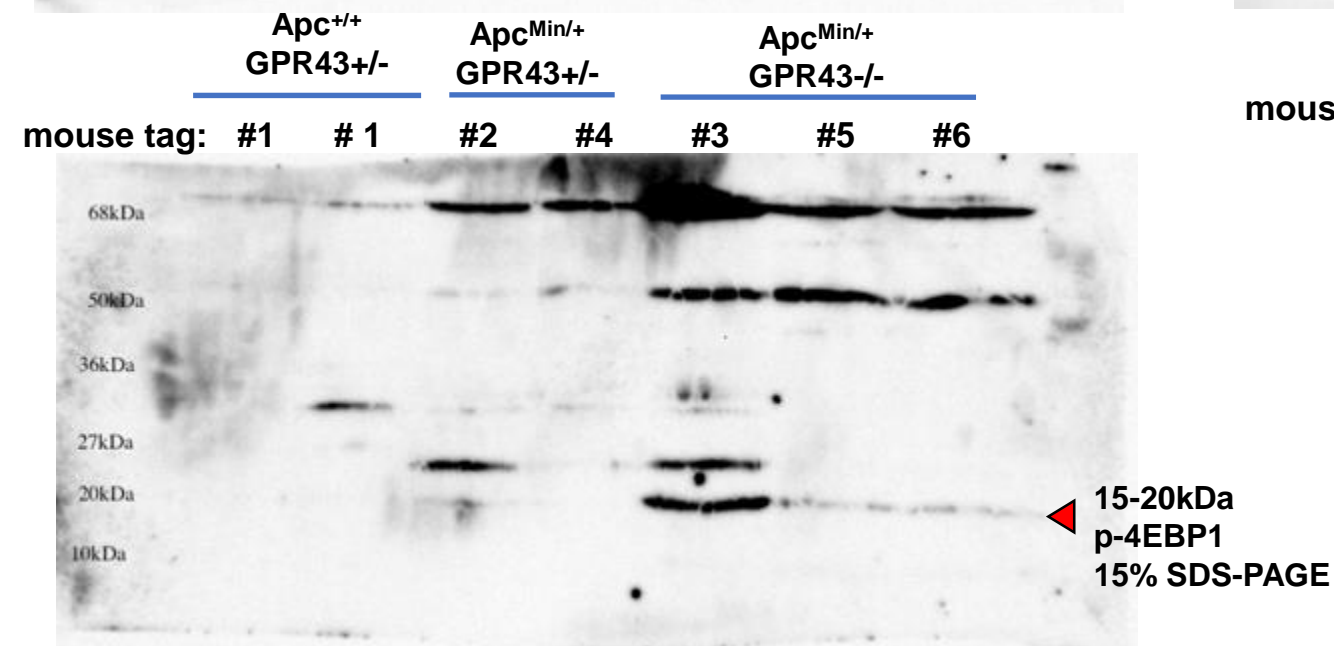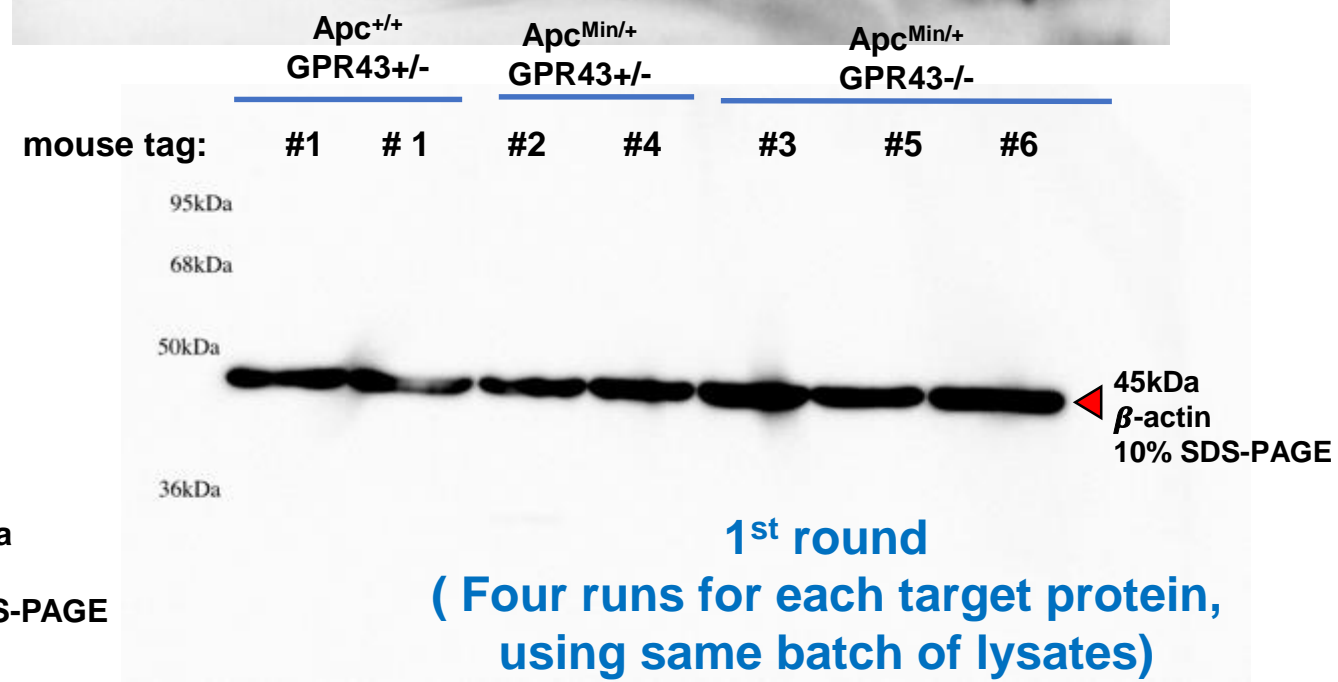

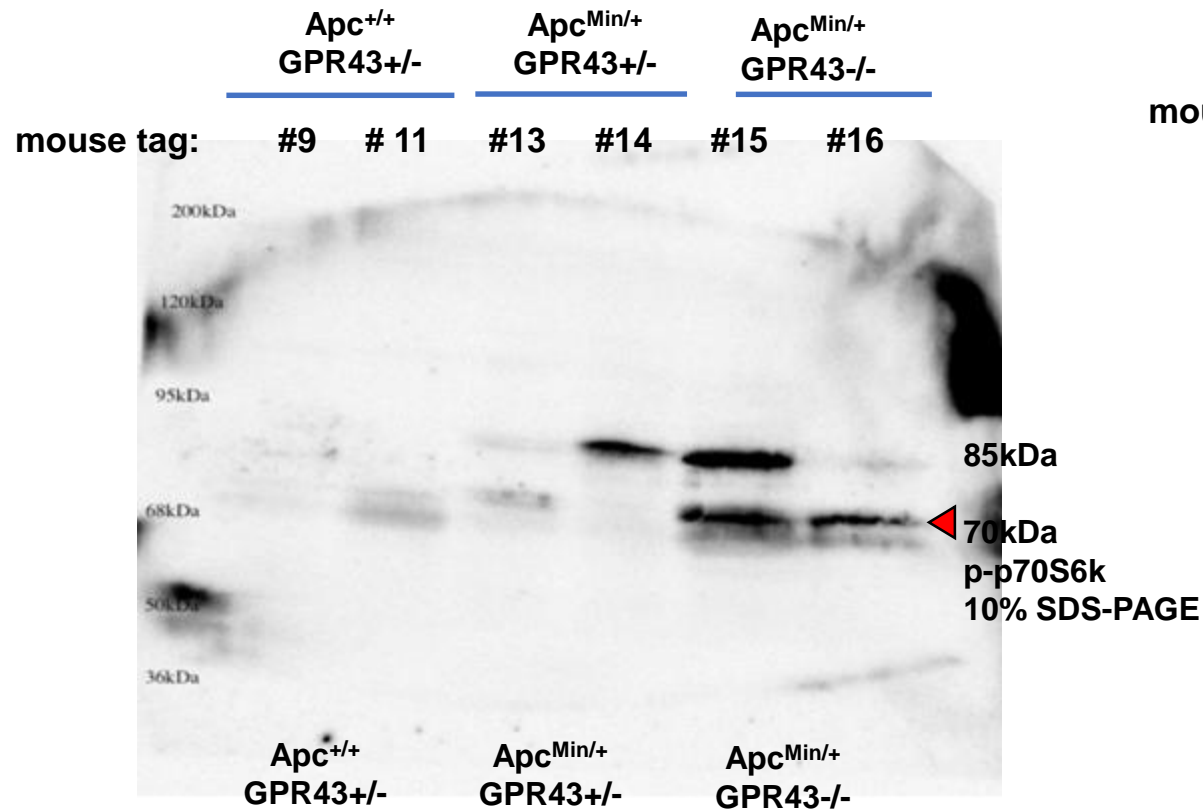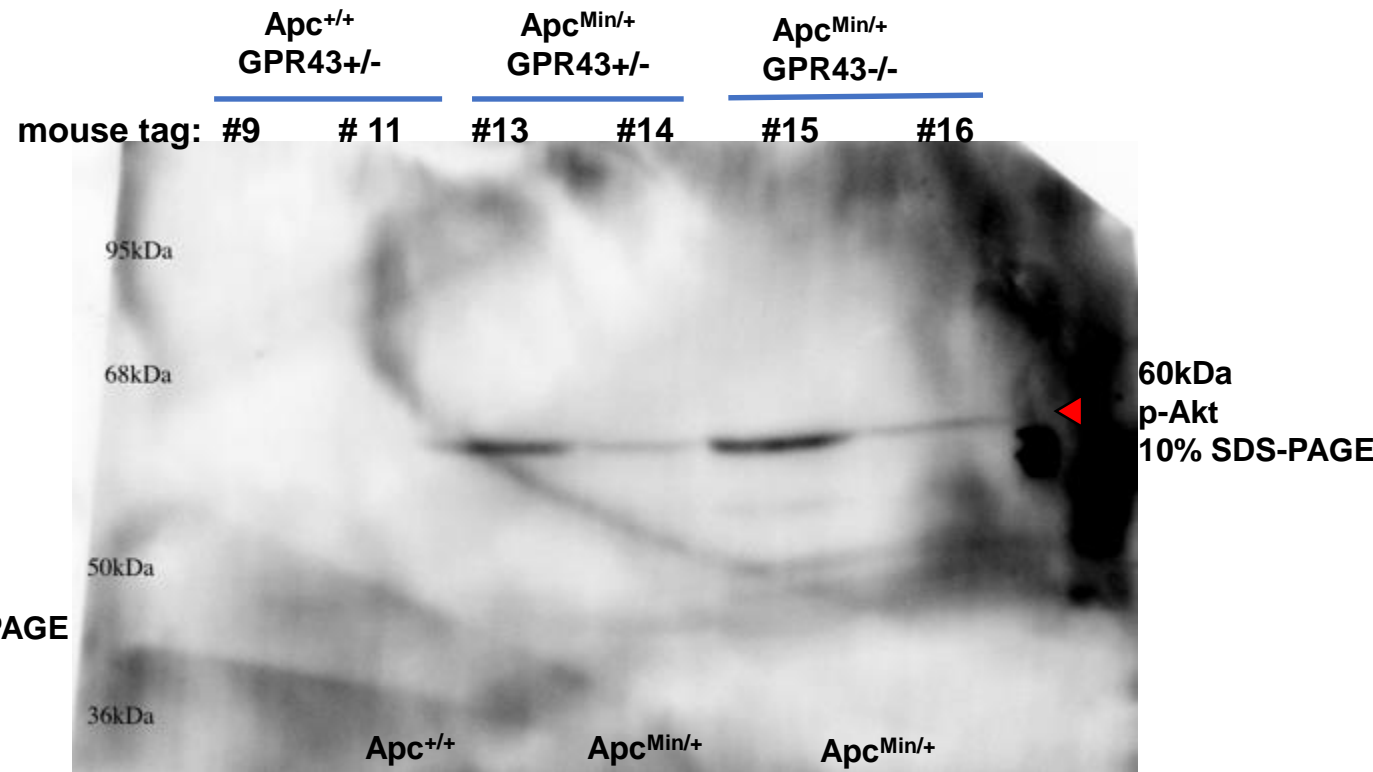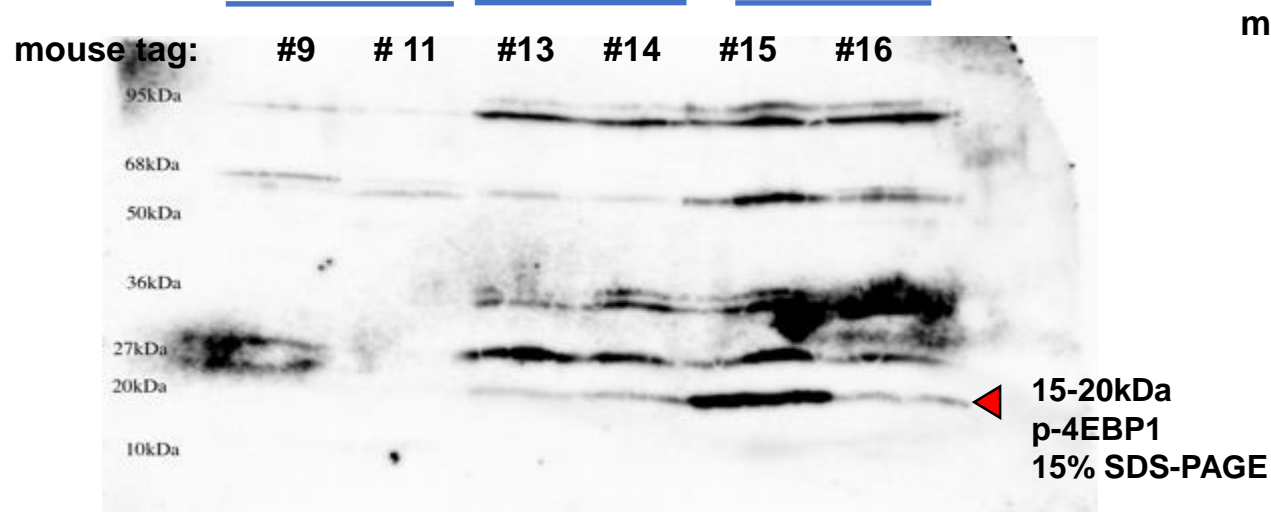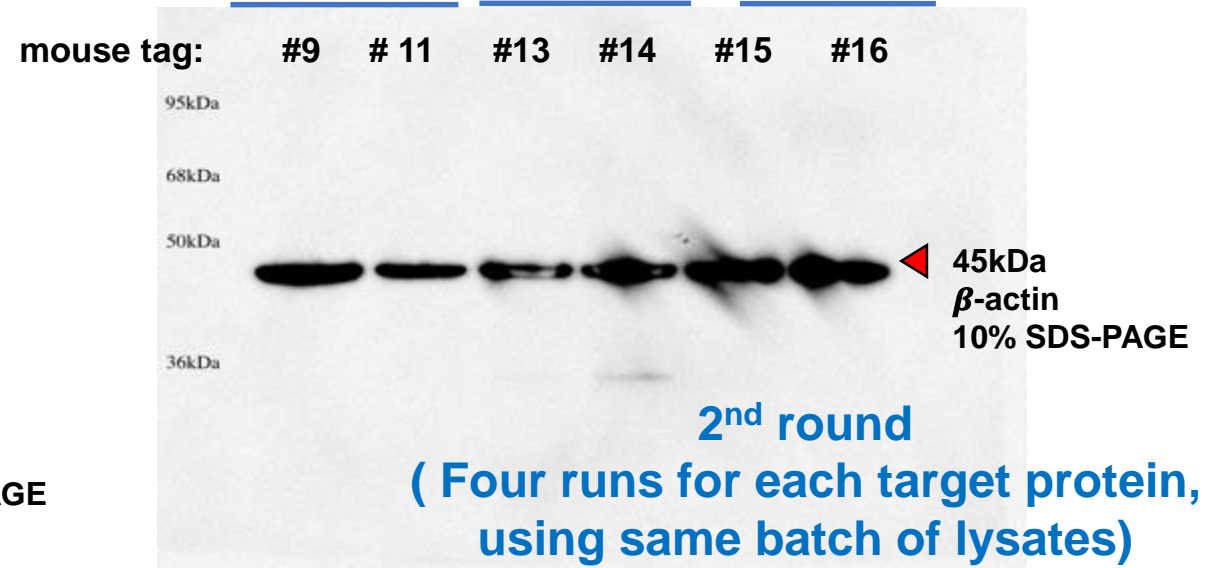

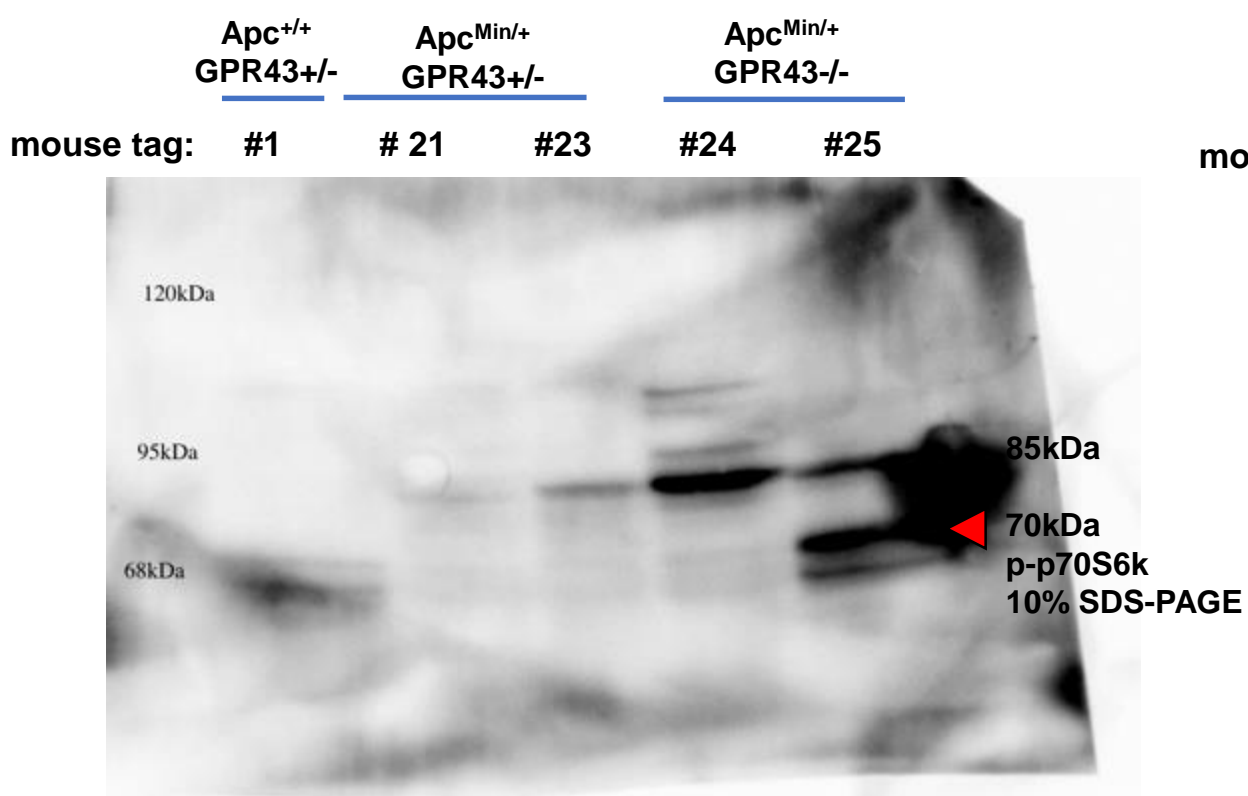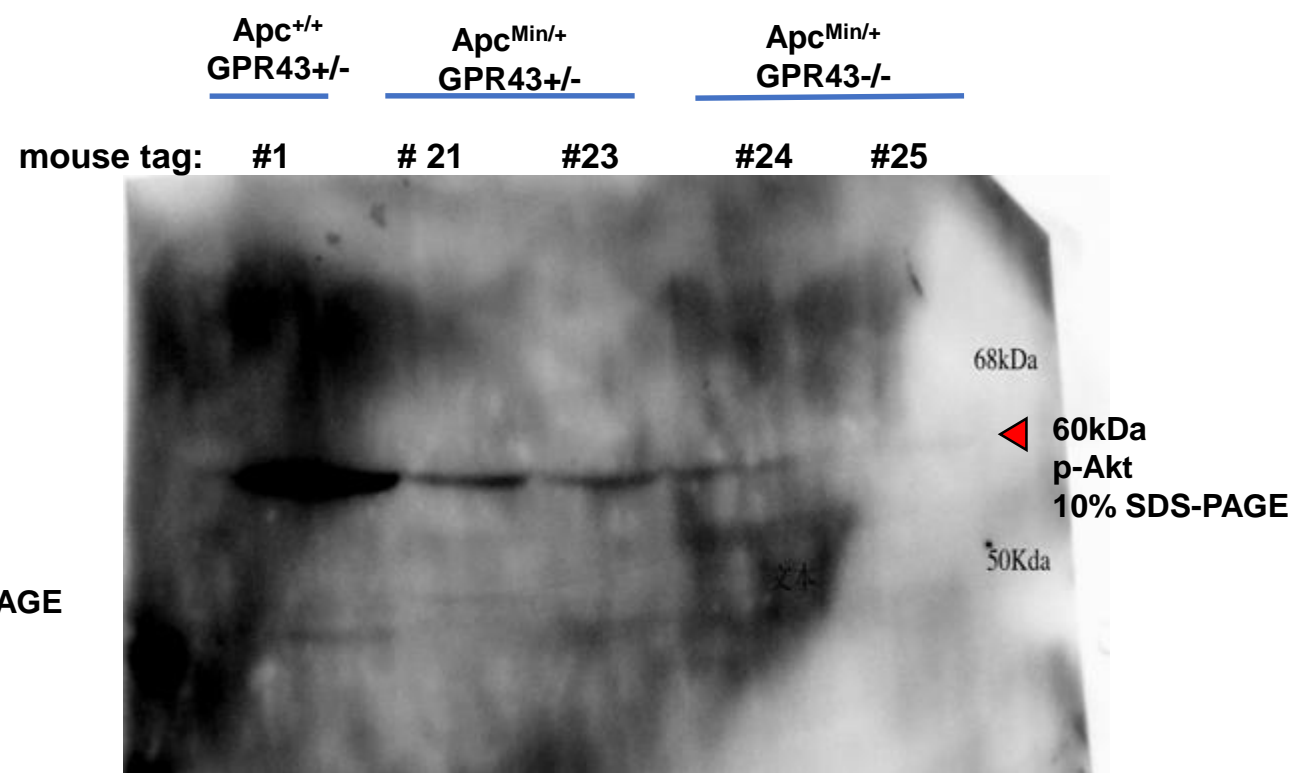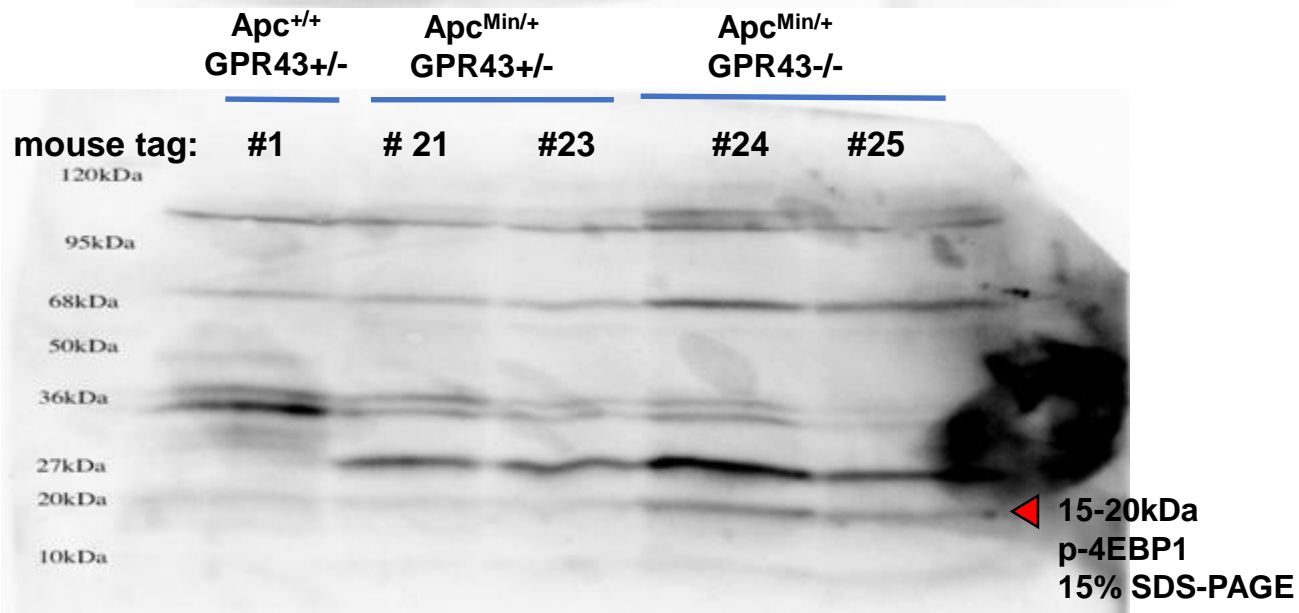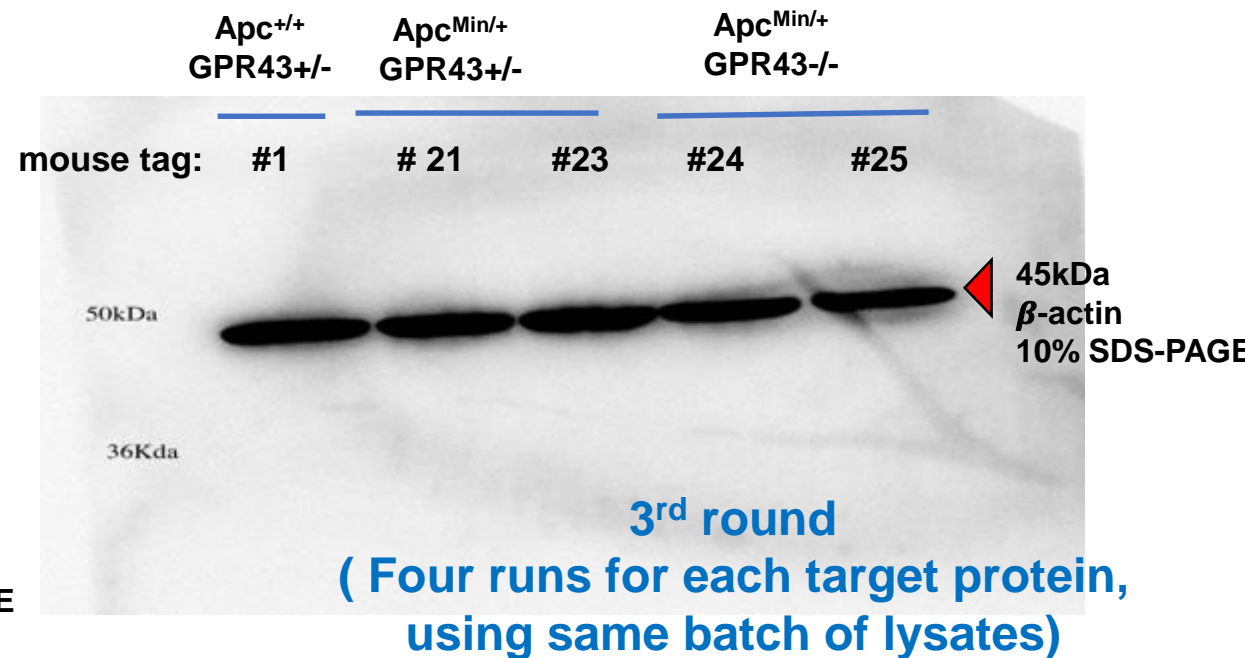

Supplement: Supplementary file 1 [file 1]
